# Supplementary material for: Brain-derived tau: a novel blood-based biomarker for Alzheimer’s disease-type neurodegeneration
Source: PubMed Central journal article supplement — Brain. 2022 Dec 27;146(3):1152–65. doi: 10.1093/brain/awac407 (PMC9976981; doi:10.1093/brain/awac407), 2022-12-27
Supplement: awac407_supplementary_data.pdf [file awac407_supplementary_data.pdf]

## Supplementary Appendix

# Brain-derived tau: a novel blood-based biomarker for Alzheimer's disease-type neurodegeneration

Fernando Gonzalez-Ortiz<sup>1</sup>, Michael Turton<sup>2</sup>, Przemysław R. Kac<sup>1</sup>, Denis Smirnov<sup>3</sup>, Enrico Premi<sup>4</sup>, Roberta Ghidoni<sup>5</sup>, Luisa Benussi<sup>5</sup>, Valentina Cantoni<sup>4</sup>, Claudia Saraceno<sup>5</sup>, Jasmine Rivolta<sup>4</sup>, Nicholas J. Ashton<sup>1,6,7,8</sup>, Barbara Borroni<sup>4</sup>, Douglas Galasko<sup>3</sup>, Peter Harrison<sup>2</sup>, Henrik Zetterberg<sup>1,9,10,11,12</sup>, Kaj Blennow<sup>1,9</sup>, Thomas K. Karikari<sup>1,13,#</sup>

<sup>1</sup>Department of Psychiatry and Neurochemistry, Institute of Neuroscience and Physiology, The Sahlgrenska Academy, University of Gothenburg, Sweden

<sup>2</sup>Bioventix Plc, 7 Romans Business Park, East Street, Farnham, Surrey GU9 7SX, UK

<sup>3</sup>University of California, San Diego and Shiely-Marcos Alzheimer's Disease Research Center, La Jolla, CA, USA

<sup>4</sup>Neurology Unit, Department of Clinical and Experimental Sciences, University of Brescia, Brescia, Italy

<sup>5</sup>Molecular Markers Laboratory, IRCCS Istituto Centro San Giovanni di Dio Fatebenefratelli, Brescia, Italy

<sup>6</sup>Wallenberg Centre for Molecular and Translational Medicine, University of Gothenburg, Sweden

<sup>7</sup>King's College London, Institute of Psychiatry, Psychology & Neuroscience, Maurice Wohl Clinical Neuroscience Institute, London, UK

<sup>8</sup>NIHR Biomedical Research Centre for Mental Health & Biomedical Research Unit for Dementia at South London & Maudsley NHS Foundation, London, UK

<sup>9</sup>Clinical Neurochemistry Laboratory, Sahlgrenska University Hospital, Mölndal, Sweden

<sup>10</sup>Department of Neurodegenerative Disease, UCL Institute of Neurology, London, UK

<sup>11</sup>UK Dementia Research Institute at UCL, London, UK

<sup>12</sup>Hong Kong Center for Neurodegenerative Diseases, Hong Kong, China

<sup>13</sup>Department of Psychiatry, University of Pittsburgh, Pittsburgh, PA, USA

#Correspondence to: Thomas K. Karikari, PhD.

Assistant Professor, Department of Psychiatry and Neurochemistry, Institute of Neuroscience and Physiology, The Sahlgrenska Academy, University of Gothenburg, SE 431 80, Mölndal, Sweden.

Email: [Thomas.Karikari@gu.se](mailto:Thomas.Karikari@gu.se)

**Running title:** Plasma BD-tau as an AD degeneration marker

## Supplementary Figures

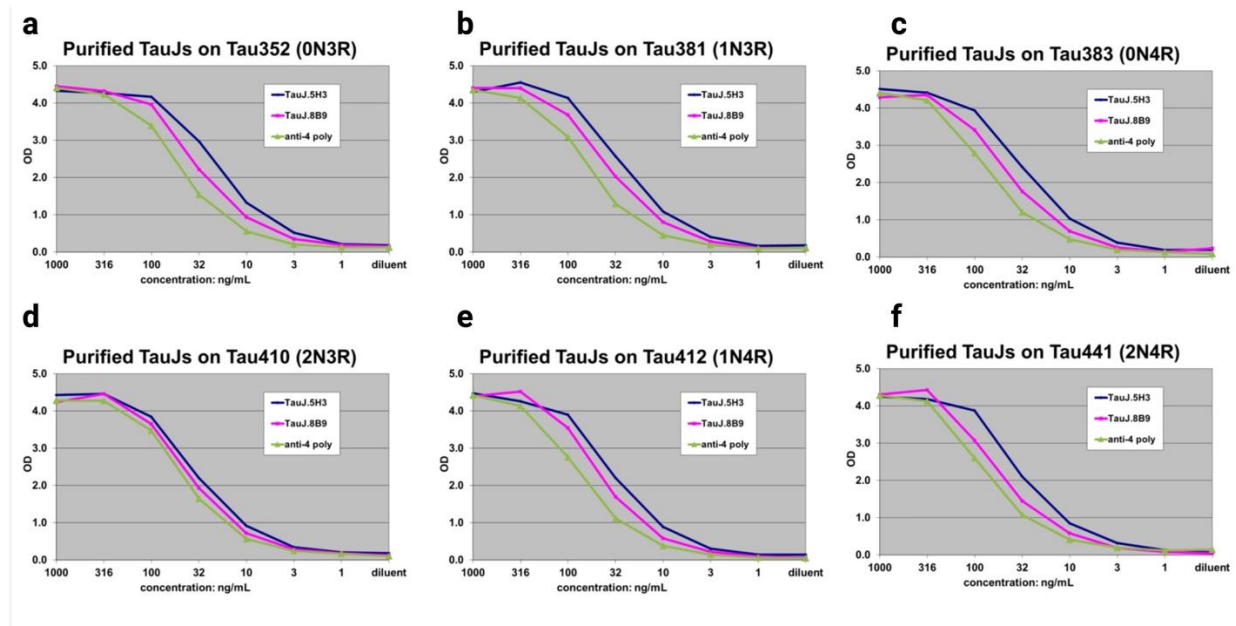

**Supplementary Fig. 1. TauJ.5H3 recognizes all six tau isoforms expressed in the adult human CNS.** The plots in (A) – (F) show the binding profile of the anti-BD-tau antibody TauJ.5H3 to all six isoforms of tau commonly expressed in the adult human brain. The plots start from the shortest isoform (0N3R) in (A) to the longest isoform (2N4R) in (F).

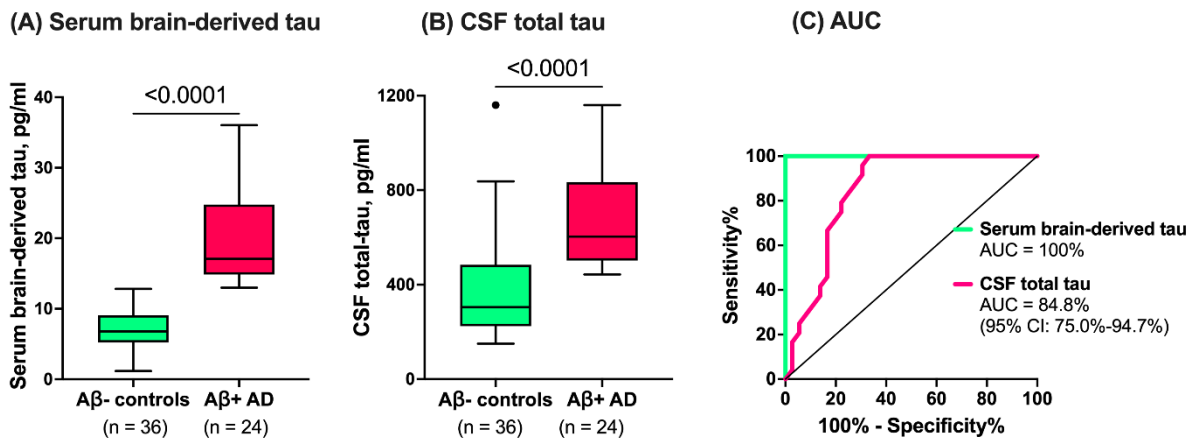

**Supplementary Fig. 2. Concentrations and diagnostic accuracy of serum BD-tau versus CSF t-tau in the Neurochemical cohort.** The Tukey plots in (A) show the profile of serum BD-tau in A $\beta$ + Alzheimer's disease and A $\beta$ - controls. (B) ROC curve and AUC values for the discriminatory performance of serum BD-tau to separate the two groups. P values show the outcome of Mann Whitney test.

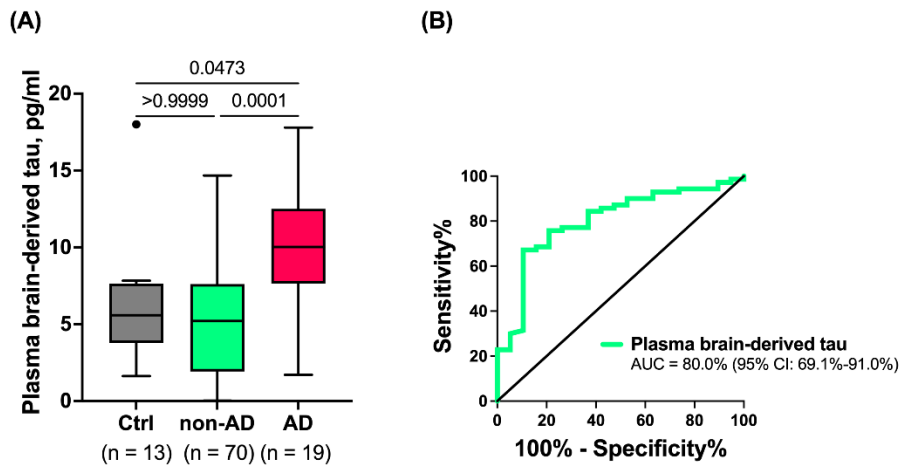

**Supplementary Fig. 3. Levels and diagnostic performance of plasma BD-tau in the Memory Clinic cohort-2.** (A) Tukey plots of plasma BD-tau levels. (B) ROC curve and AUC values for differentiating Alzheimer's disease (AD) from other neurodegenerative diseases (non-AD).

## Supplementary Tables

**Supplementary Table 1: Demographic characteristics of the Discovery and Neurochemical cohorts.**

|                                       | Discovery cohort |                     | Neurochemical cohort |                     |
|---------------------------------------|------------------|---------------------|----------------------|---------------------|
|                                       | Control          | Alzheimer's disease | Control              | Alzheimer's disease |
| <b>Sample size</b>                    | 10               | 10                  | 36                   | 24                  |
| <b>Age, y</b>                         | 58.4 ±17.1       | 71.4 ±7.3           | 65.1 ±13.7           | 71.1 ±8.9           |
| <b>Gender, F, n (%)</b>               | 6 (60%)          | 7(70%)              | 17 (47.2%)           | 19 (79.1%)          |
| <b>CSF Aβ42, pg/ml</b>                | 965 ±273.6*      | 453.5 ±106.3        | 855.6 ±346*          | 423 ±112.5          |
| <b>CSF t-tau (Innotest), pg/ml</b>    | 270.2 ±104.7*    | 675.3 ±249.1        | 389.9 ±237*          | 689.7 ±224          |
| <b>CSF p-tau181 (Innotest), pg/ml</b> | 32.4 ±12.96*     | 95 ±28.3            | 53.6 ±38.6*          | 103.1 ±37.44        |
| <b>CSF BD-tau, pg/ml</b>              | 101.1 ±39.8*     | 218.8 ±62.9         | N/A                  | N/A                 |
| <b>Serum BD-tau, pg/ml</b>            | 3.6 ±2.5*        | 34.7 ±10.1          | 7.2 ±2.8*            | 22.7 ±17.5          |
| <b>CSF t-tau (Quanterix), pg/ml</b>   | 232.5 ±86.1*     | 379.5 ±122.4        | N/A                  | N/A                 |
| <b>Serum t-tau (Quanterix), pg/ml</b> | 6.0 ±8.1         | 11.6 ± 16.1         | N/A                  | N/A                 |

\*Significantly different compared with the Alzheimer's disease group (P<0.0001). Mann Whitney test.

**Supplementary Table 2. Demographic characteristics of the Memory clinic cohort-1 and Memory clinic cohort-2.**

|                                | Controls    | AD           | Non-AD      |
|--------------------------------|-------------|--------------|-------------|
| <b>Memory Clinic-1</b>         |             |              |             |
| <b>Sample size</b>             | 59          | 60           | 256         |
| <b>Age, years</b>              | 65.3 ± 12.1 | 75.5 ± 8.2   | 66.3 ± 8.1  |
| <b>Gender, F, <i>n</i> (%)</b> | 48 (81.3%)  | 41 (68.3%)   | 126 (49.2)  |
| <b>Serum BD-tau, pg/ml</b>     | 3.6 ± 2     | 32.4 ± 141.6 | 4.2 ± 19.8  |
| <b>Serum NFL, pg/ml</b>        | 15.2 ± 8    | 34.1 ± 22.5  | 40.1 ± 29.2 |
| <b>Memory Clinic-2</b>         |             |              |             |
| <b>Sample size</b>             | 13          | 19           | 70          |
| <b>Age, y</b>                  | 55.7 ± 15.1 | 68.3 ± 6.1   | 62.9 ± 10.3 |
| <b>Gender, F, <i>n</i> (%)</b> | 8 (61.5%)   | 10 (52.6%)   | 42 (60%)    |
| <b>Plasma BD-tau, pg/ml</b>    | 5.3 ± 2.0   | 9.4 ± 4.1    | 4.9 ± 3.4   |

**Supplementary Table 3. Spearman correlation of serum BD-tau with other biomarkers in the Discovery and Neurochemical cohorts**

| Group                       | Serum t-tau (Quanterix) | CSF t-tau (Quanterix) | CSF BD-tau           | CSF total tau (INNOTEST) | CSF p-tau181 (INNOTEST) | CSF A $\beta$ 42 (INNOTEST) |
|-----------------------------|-------------------------|-----------------------|----------------------|--------------------------|-------------------------|-----------------------------|
| <b>Discovery cohort</b>     |                         |                       |                      |                          |                         |                             |
| Entire cohort               | rho = 0.26 (p=0.2738)   | rho= 0.75 (p=0.0002)  | rho= 0.85 (p<0.0001) | rho= 0.83 (p<0.0001)     | rho= 0.86 (p<0.0001)    | rho= -0.73 (p=0.0003)       |
| AD                          | rho= 0.08 (p=0.8382)    | rho= 0.83 p= 0.0047   | rho= 1.00 (p<0.0001) | rho= 0.67 (p=0.0390)     | rho= 0.69 (p=0.0326)    | rho= 0.18 (p=0.6136)        |
| Controls                    | rho= -0.08 (p=0.8382)   | rho= 0.07 p= 0.8810   | rho= 0.05 (p=0.8916) | rho= 0.15 (p=0.6738)     | rho= 0.19 (p=0.6073)    | rho= -0.01 (p=0.8916)       |
| <b>Neurochemical cohort</b> |                         |                       |                      |                          |                         |                             |
| Entire cohort               | N/A                     | N/A                   | N/A                  | rho=0.65 (p<0.0001)      | rho= 0.64 (p <0.0001)   | rho= -0.59 (p<0.0001)       |
| AD                          | N/A                     | N/A                   | N/A                  | rho=0.59 (p=0.0024)      | rho= 0.63 (p= 0.0009)   | rho= -0.22 (p= 0.3056)      |
| Controls                    | N/A                     | N/A                   | N/A                  | rho=0.28 (p=0.0996)      | rho= 0.26 (p= 0.1254)   | rho= -0.22 (p= 0.1979)      |

N/A = not available

**Supplementary Table 4. Spearman correlation of plasma BD-tau with other plasma biomarkers in the Neuropathology cohort**

|                         | <b>Plasma NfL</b>        | <b>Plasma p-tau181</b>   | <b>Plasma p-tau231</b>  | <b>Plasma A<math>\beta</math>42/40 ratio</b> |
|-------------------------|--------------------------|--------------------------|-------------------------|----------------------------------------------|
| Entire cohort           | rho=0.38<br>(p=0.0054)   | rho= 0.69<br>(p<0.0001)  | rho= 0.75<br>(p<0.0001) | rho= -0.39 (p= 0.0045)                       |
| Alzheimer's disease     | rho= 0.74<br>(p<0.0001)  | rho= 0.54<br>(p <0.0011) | rho= 0.69<br>(p<0.0001) | rho= 0.03 (p= 0.8666)                        |
| Non-Alzheimer's disease | rho= 0.16<br>(p= 0.5153) | rho= 0.19<br>(p= 0.4609) | rho= 0.29 (p= 0.2431)   | rho= -0.36 (p= 0.1372)                       |

**Supplementary Table 5. Spearman correlation of serum BD-tau with other blood biomarkers in the Memory Clinic cohort-1**

| <b>Group</b>                           | <b>Serum NfL</b>         |
|----------------------------------------|--------------------------|
| Entire cohort                          | rho = -0.07 (p= 0.2066 ) |
| Alzheimer's disease                    | rho= 0.63 (p <0.0001)    |
| Controls                               | rho= 0.33 (p= 0.0115)    |
| Non-Alzheimer's diseases<br>(combined) | rho= -0.12 (p= 0.0658)   |
